# Supplementary material for: Beneficial Microorganisms to Control the Gray Mold of Grapevine: From Screening to Mechanisms
Source: MDPI journal article supplement (doi:10.3390/microorganisms9071386), 2021-06-25
Supplement: s1 [file s1]

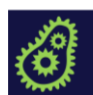

## Supplementary Materials

**Table S1.** Project information of the draft genome sequences of the strains.

| Property                   | Strain S3 Genome           | Strain S6 Genome           |
|----------------------------|----------------------------|----------------------------|
| Sequencing platforms       | Illumina MiSeq, HiSeq 2500 | Illumina MiSeq, HiSeq 2500 |
| Libraries used             | 2- 250-bp                  | 2- 250-bp                  |
| Mean coverage              | 209X                       | 155X                       |
| Assembly Method            | SPAdes v. 3.9.0            | SPAdes v. 3.9.0            |
| BIOPROJECT                 | PRJNA700080                | PRJNA700080                |
| BioSample                  | SAMN17823213               | SAMN17823214               |
| Source Material Identifier | Soil and grapes samples    | Soil and grapes samples    |
| Project relevance          | Agriculture                | Agriculture                |
| GenBank ID                 | JAFETM000000000            | JAFETL000000000            |

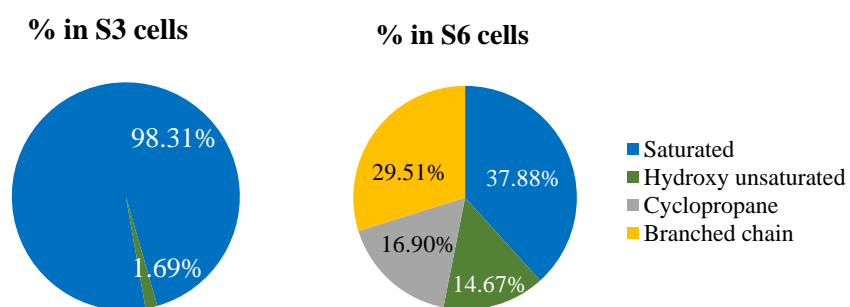

**Figure S1.** Proportion of different structure in a fatty acid profile of isolated strains.

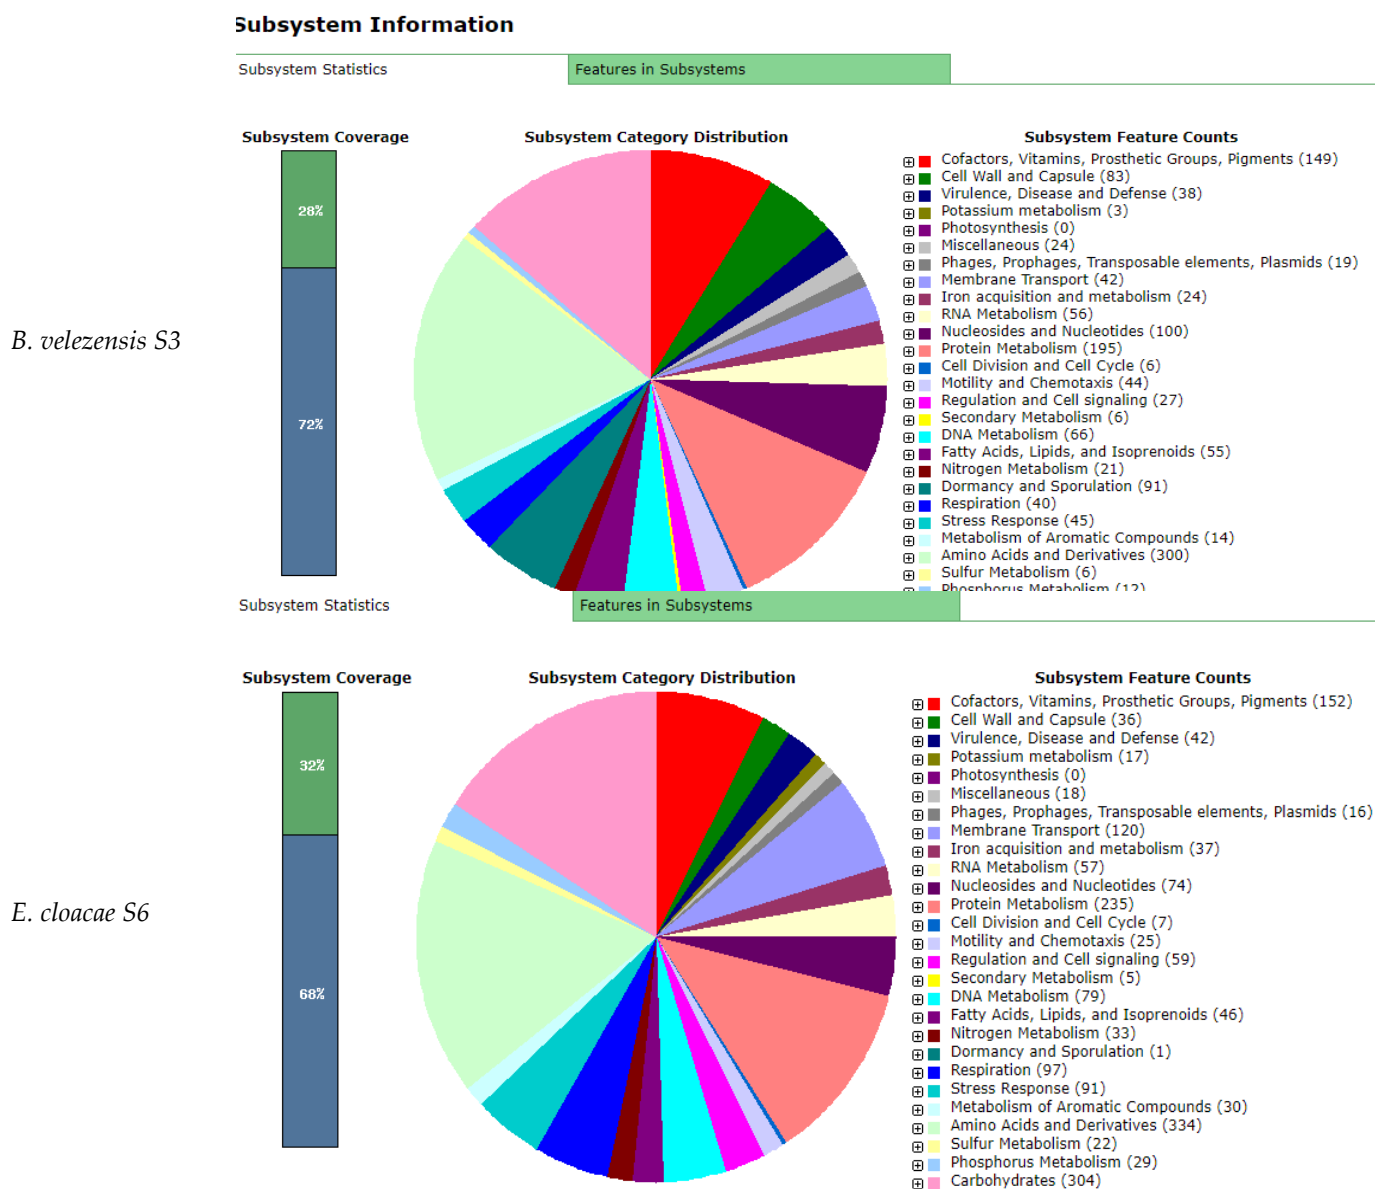

**Figure S2.** Subsystem information of the strain *B. velezensis* S3 and *E. cloacae* S6 and predicted by SEED viewer, most of which were involved in amino acids and derivatives synthesis, carbohydrate metabolism, cofactors, vitamins, prosthetic groups and pigment formations, and stress response.
